# Supplementary material for: A Bioinspired Self‐Healing Conductive Hydrogel Promoting Peripheral Nerve Regeneration
Source: PubMed Central journal article supplement (PMC10558694; doi:10.1002/advs.202302519), 2023-08-23
Supplement: ADVS-10-2302519-s001.pdf [file ADVS-10-2302519-s001.pdf]

## Supporting Information

for *Adv. Sci.*, DOI 10.1002/adv.202302519

A Bioinspired Self-Healing Conductive Hydrogel Promoting Peripheral Nerve Regeneration

*Hongyun Xuan, Shuyuan Wu, Yan Jin, Shuo Wei, Feng Xiong, Ye Xue, Biyun Li\**, *Yumin Yang\**  
and *Huihua Yuan\**

# Supplementary Materials for

## A bioinspired self-healing conductive hydrogel promoting peripheral nerve regeneration

Hongyun Xuan, Shuyuan Wu, Yan Jin, Shuo Wei, Feng Xiong, Ye Xue, Biyun Li\*, Yumin Yang\*, Huihua Yuan\*

\*Corresponding author. Email: libiyun1986@163.com, yangym@ntu.edu.cn, yuanhh@ntu.edu.cn

### This PDF file includes:

Materials and Methods

Figs. S1 to S10

Tables S1 to S6

### Supplementary Materials

Materials and Methods

FTIR characterization of HASPy hydrogel

The frequency range of the FTIR spectroscope was set to  $4000\text{--}500\text{ cm}^{-1}$ , and each sample was scanned 32 times.

UV-Vis characterization of HASPy

UV-Vis absorbance spectra of HASPy films deposited on the glass slides were recorded using spectrometer in the 850–300 nm wavelength range.

Determination of graft ratio of HA-Cys-Py

Since HA-Cys-Py was synthesized based on amide bonds, the grafting ratio of HA-Cys-Py can be measured by the residual carboxyl group content. The content of carboxyl group (CC) was measured by conductivity titration method. The sample to be tested was weighed with 0.3g of dried HA-Cys-Py and added with 55mL distilled water and 5 mL 0.01M sodium chloride solution. The sample was fully stirred with magnetic agitator (the concentration was about 0.5%), and then 0.1M HCl was added to adjust the pH value of the mixture 3.0. Magnetic stirring 1h to ensure the acidification of the base. Then, 0.04M NaOH solution was titrated at the rate of 0.1mL/min, and the conductivity meter was used to monitor the conductivity of the mixture during the reaction process. The titration was stopped until the pH value of the solution was 11, and the carboxyl group content was calculated according to the consumption of sodium hydroxide and the conductivity.

Draw the curve of sodium hydroxide consumption (volume, ml) vs. conductivity according to the method mentioned above (Fig.S3), and calculate the carboxyl group content according to the formula:

$$CC = 0.04 \text{ mol/L} \times (V_B - V_A) \text{ mL} / 0.3 \text{ g} \quad (1)$$

Where  $V_A$  and  $V_B$  are respectively the x-coordinate values corresponding to the intersection of the left and right tangent lines of the conductivity curve and the horizontal line of the lowest point of the curve.

$$\text{Graft ratio} = (CC_{\text{HA}} - CC_{\text{HA-Cys-Py}}) / CC_{\text{HA}} \times 100 \quad (2)$$

#### Electroactivity measurement

The conductivity of the hydrogels was measured using four probes and an electrochemical workstation. In 0.1 mol/L PBS electrolyte solution, a traditional three-electrode system with Pt as the counter electrode, an Ag/AgCl electrode as the reference electrode, and a hydrogel sample as the working electrode was used for electroactivity analysis at room temperature using an electrochemical workstation (CHI660D, China). Based on cyclic voltammetry (CV) measurements, the potential range was -0.8–0.2 V and the scanning rate 100 mV/s. The conductivity of the hydrogels is calculated according to the following formulas:

$$V = I \times R \quad (3)$$

$$\sigma = L / RS \quad (4)$$

$$R = \rho L / S \quad (5)$$

Where  $\sigma$  ( $\text{S} \cdot \text{cm}^{-1}$ ) is the desired conductivity,  $L$  (cm) is the distance between the reference electrode and the working electrode,  $S$  ( $\text{cm}^2$ ) is the cross-sectional area of the measured hydrogel,  $R$  ( $\Omega$ ) is the ohmic resistance, and  $\rho$  ( $\Omega \cdot \text{cm}$ ) is the resistivity.

#### All-Atom Molecular Dynamics simulations method

Materials Studio software was used to simulate the interactions between HASPy chains with water molecules and iron ions under the Compass force field. A simulation crystal Cell was constructed by Amorphous Cell calculation. For HASPy chains with water molecules (HASPy-W), two HASPy chains and 300 water molecules were placed in the box. For HASPy chains with iron ions, two HASPy chains, 300 water molecules, 40  $\text{Fe}^{3+}$  and 120  $\text{Cl}^-$  ions were added in the box. The initial size of the simulation unit cell is  $30.03 \text{ \AA} \times 30.03 \text{ \AA} \times 30.03 \text{ \AA}$ , with the lattice parameters of  $\alpha = \beta = \gamma = 90^\circ$ . The models were equilibrated at 298 K for 25 ps in the NPT ensemble.

#### Self-healing experiment

The self-healing behavior of hydrogels was directly observed. The original sample was usually made into rectangular strips ( $10 \times 5 \times 3 \text{ mm}$ ), and then the hydrogel was cut into two equal parts from the middle. The cut surfaces were then placed in full contact and the hydrogel was wrapped in a petri dish for self-healing. After 30 min of self-healing, the hydrogel completely returned to its original state, and tensile and tensile tests were conducted to evaluate the tensile strength before and after self-healing.

#### *In vitro* degradation test

First, 10 mg of hydrogel was placed in 1 mL PBS, and 10 mM DTT was added for incubation at 37 °C. PBS without DTT was used as the control group. Then images were obtained at regular intervals to record the morphologies of the hydrogels.

### *In vivo* biocompatibility and degradation test

The hydrogel was disinfected overnight under a UV lamp and the surgical instruments were sterilized by autoclaving. Nine adult female Sprague-Dawley (SD) rats (200–230 g) were randomly divided into three groups. After anesthesia, the rats were placed on the surgical plate, and 10-mm incisions were made on the backs of the SD rats and 30 mg of hydrogel implanted. Skin tissue samples were collected on the 7th 14th, and 28th postoperative days (PODs). Tissue samples were fixed in paraformaldehyde for 24 h and dehydrated in sucrose for 48 h. The sample was then embedded in OCT at the optimum cutting temperature and cut into slices that were 8  $\mu\text{m}$  thick. Finally, *in vivo* biocompatibility and hydrogel degradation were assessed using H&E staining.

### Hemolysis assay

Hemolysis testing of the samples was performed according to the ISO 10993-4 procedure. An anticoagulant agent (3 wv% sodium citrate + 0.1 wv % citrate + 2.5 wv % glucose) was added to the red blood cells from SD rats at a ratio of 7:1. Then 2 mL of whole blood was diluted to 4.5 ml, and a 10 mg sample was placed in 10 mL PBS, and 0.2 mL blood was added, and the solution was incubated at 37 °C for 1 h. Then, the mixed solution was centrifuged at 3000 rpm for 5 min. The absorbance at a wavelength of 545 nm was measured using a UV spectrometer, and the hemolysis rate was calculated as follows:

Hemolysis percentage =  $(\text{absorbance experimental group} - \text{absorbance negative group}) / (\text{absorbance positive group} - \text{absorbance negative group}) \times 100\%$  (6)

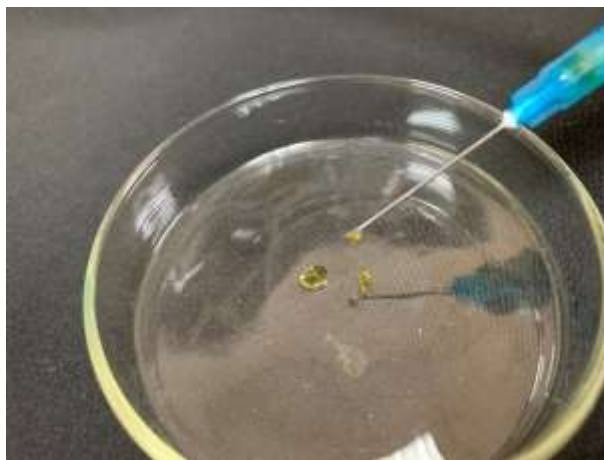

**Fig.S1** Image of the HASPy hydrogel injected through the syringe with a needle

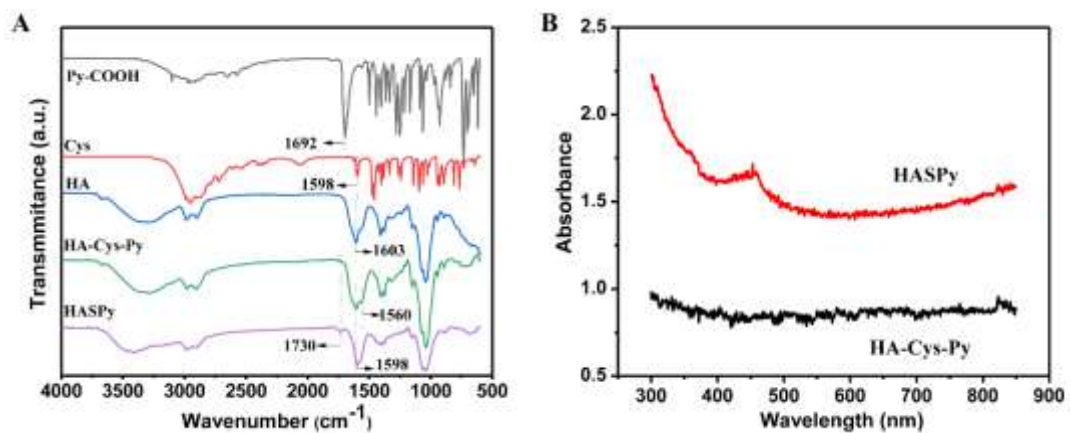

**Fig.S2** (A) FTIR analysis of Py-COOH, Cys, HA, HA-Cys-Py and HASPy. (B) UV-Vis absorption spectroscopy of HA-Cys-Py and HASPy.

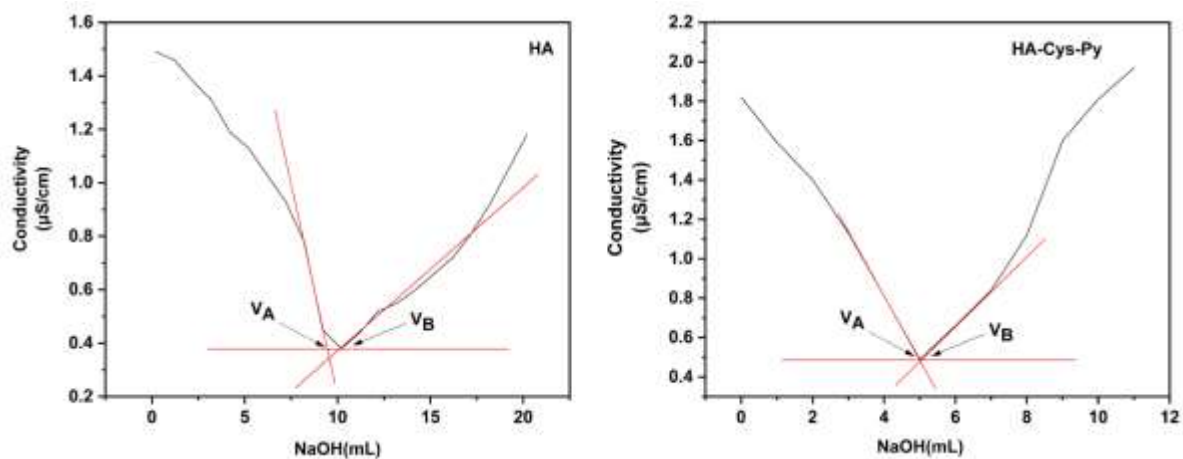

**Fig. S3** The curve of sodium hydroxide consumption (volume, ml) vs. conductivity (left: HA, right: HA-Cys-Py)

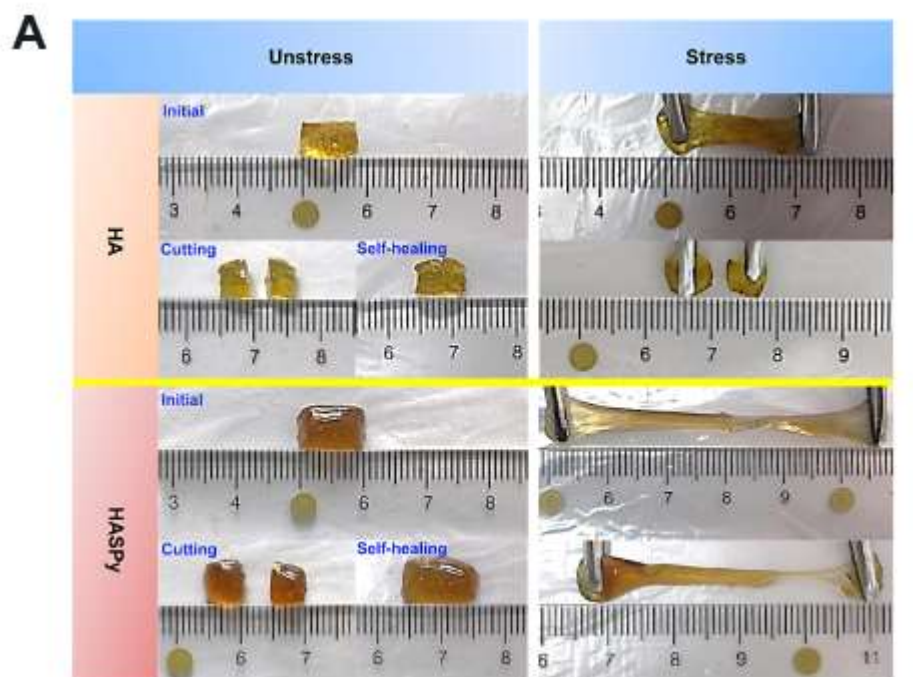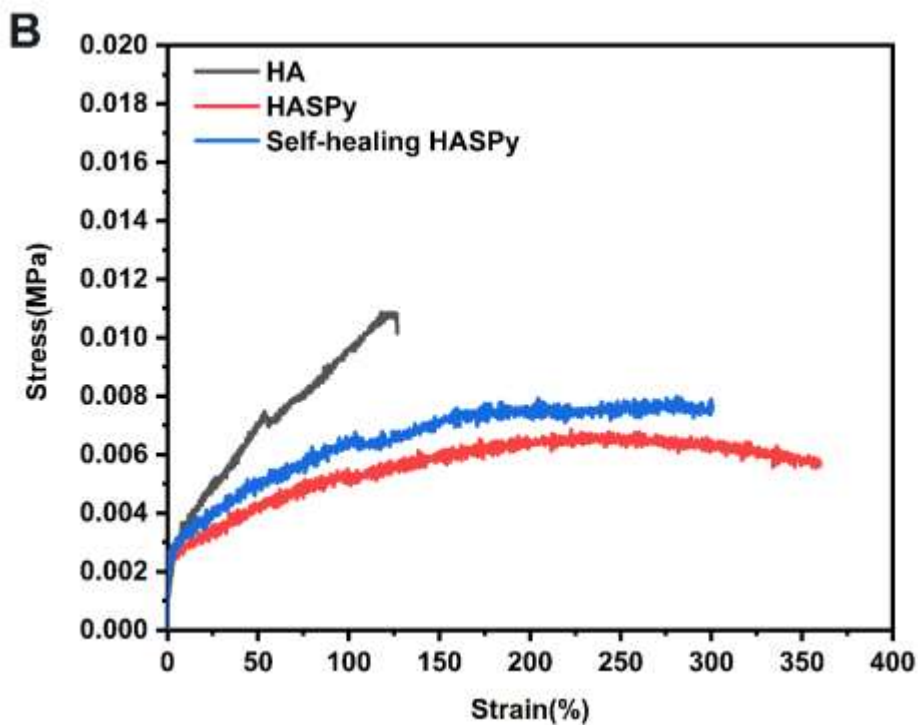

**Fig. S4 Mechanical properties of hydrogels.** (A) Images of free-standing HA hydrogel and HASPy hydrogel without stretching (left) and with stretching to elongation (right) before and after self-healing. (B) Stress changes with strain of HA hydrogels, before and after self-healing of HASPy hydrogels.

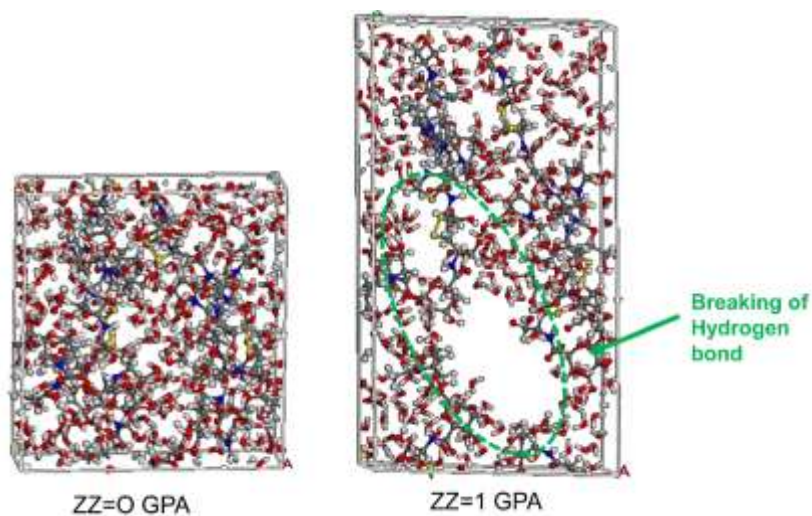

**Fig. S5** Molecular dynamics simulations of HASPy-water.

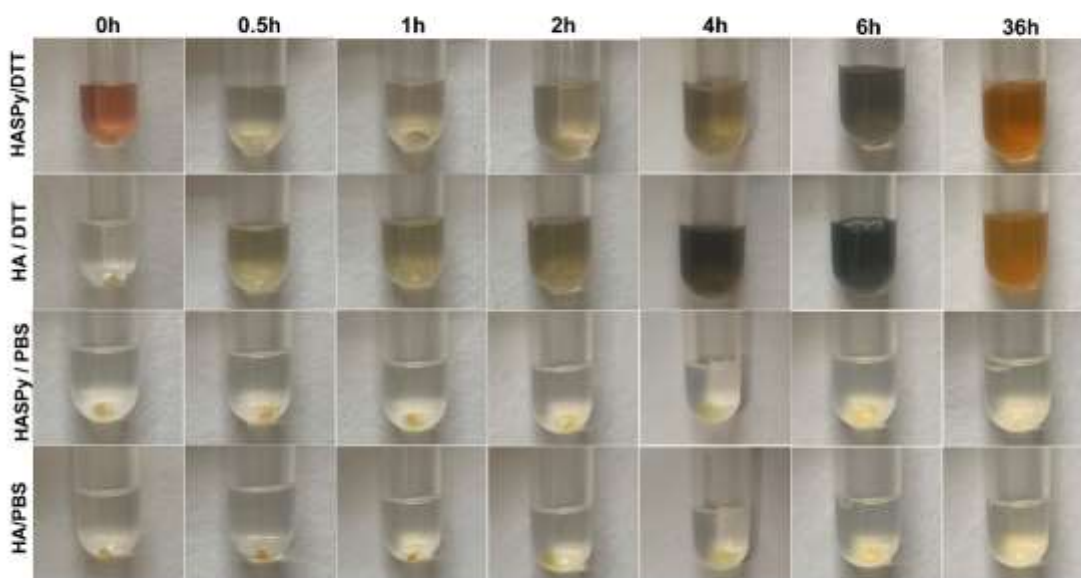

**Fig. S6 Degradation behavior of hydrogel in vitro.** Degradation image of HA and HASPy hydrogels over time from 0 to 36 h in DTT-plus PBS and PBS, respectively.

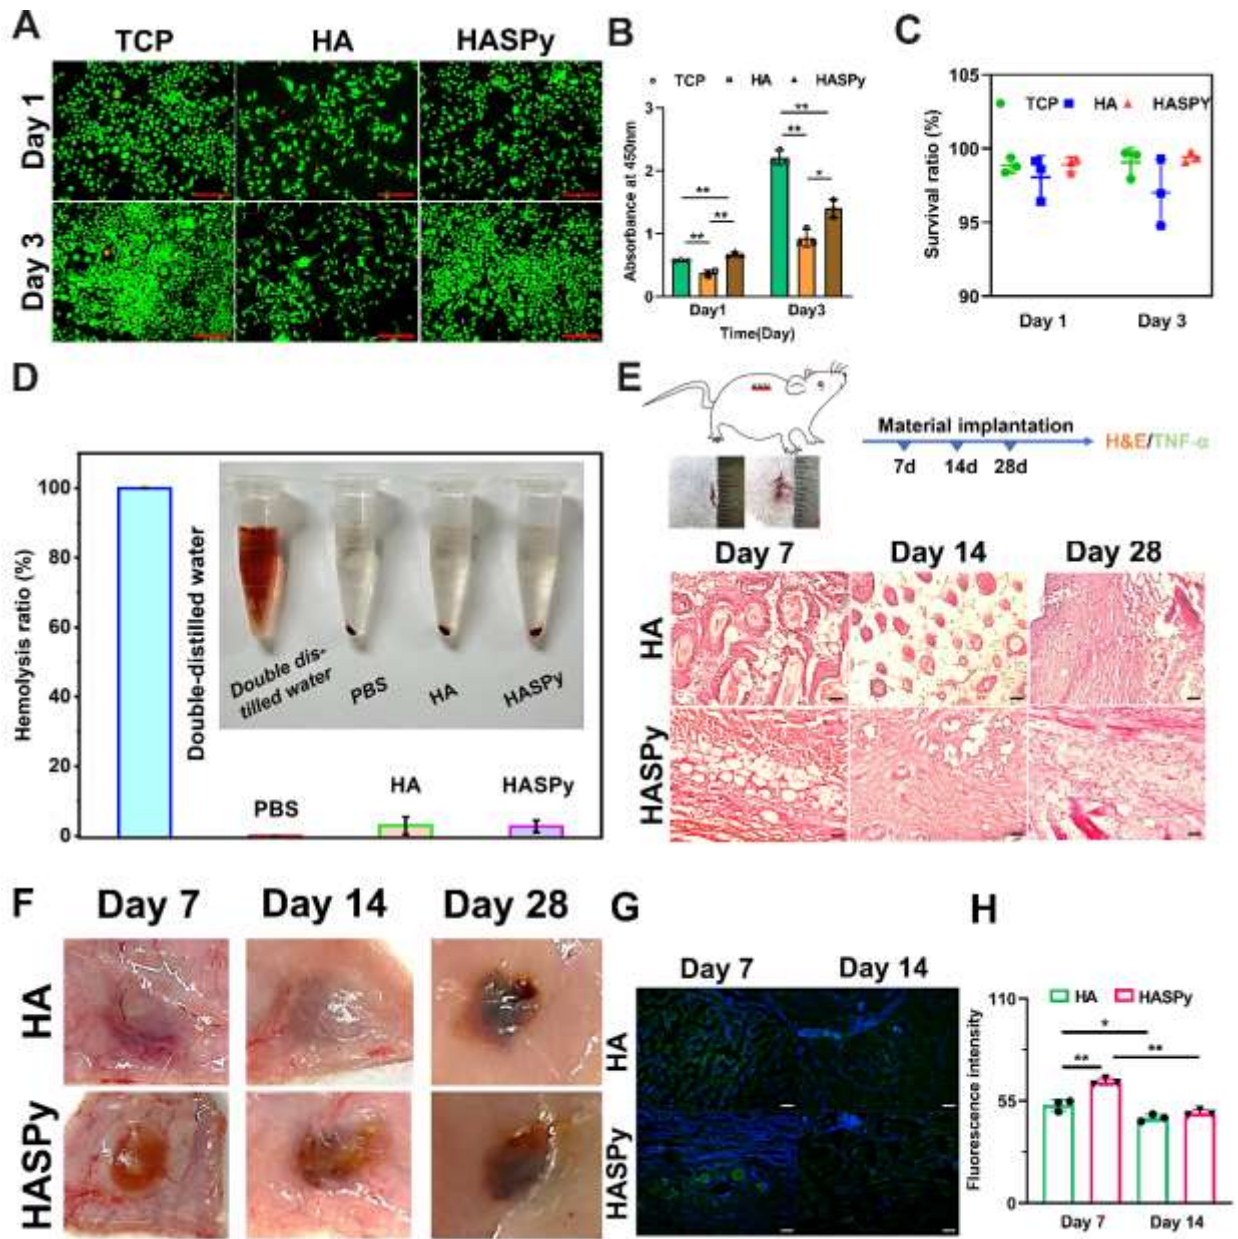

**Fig. S7 In vitro and in vivo biocompatibility of HASPy.** (A) Live and dead cell staining of L929 cells. Scale bar: 100  $\mu$ m. (B) The survival ratio. (C) Cell Counting Kit-8 (CCK-8) assay. (D) Hemolysis rate. (E) Subcutaneous biocompatibility of HA and HASPy hydrogels by H&E staining. Scale bar: 50  $\mu$ m. (F) Image of subcutaneous biocompatibility of HA and HASPy hydrogels. (G) Immunofluorescence images of TNF- $\alpha$  after 7 days and 14 days of HA and HASPy hydrogels. Scale bar: 50  $\mu$ m. (H) Fluorescence intensity of TNF- $\alpha$ .



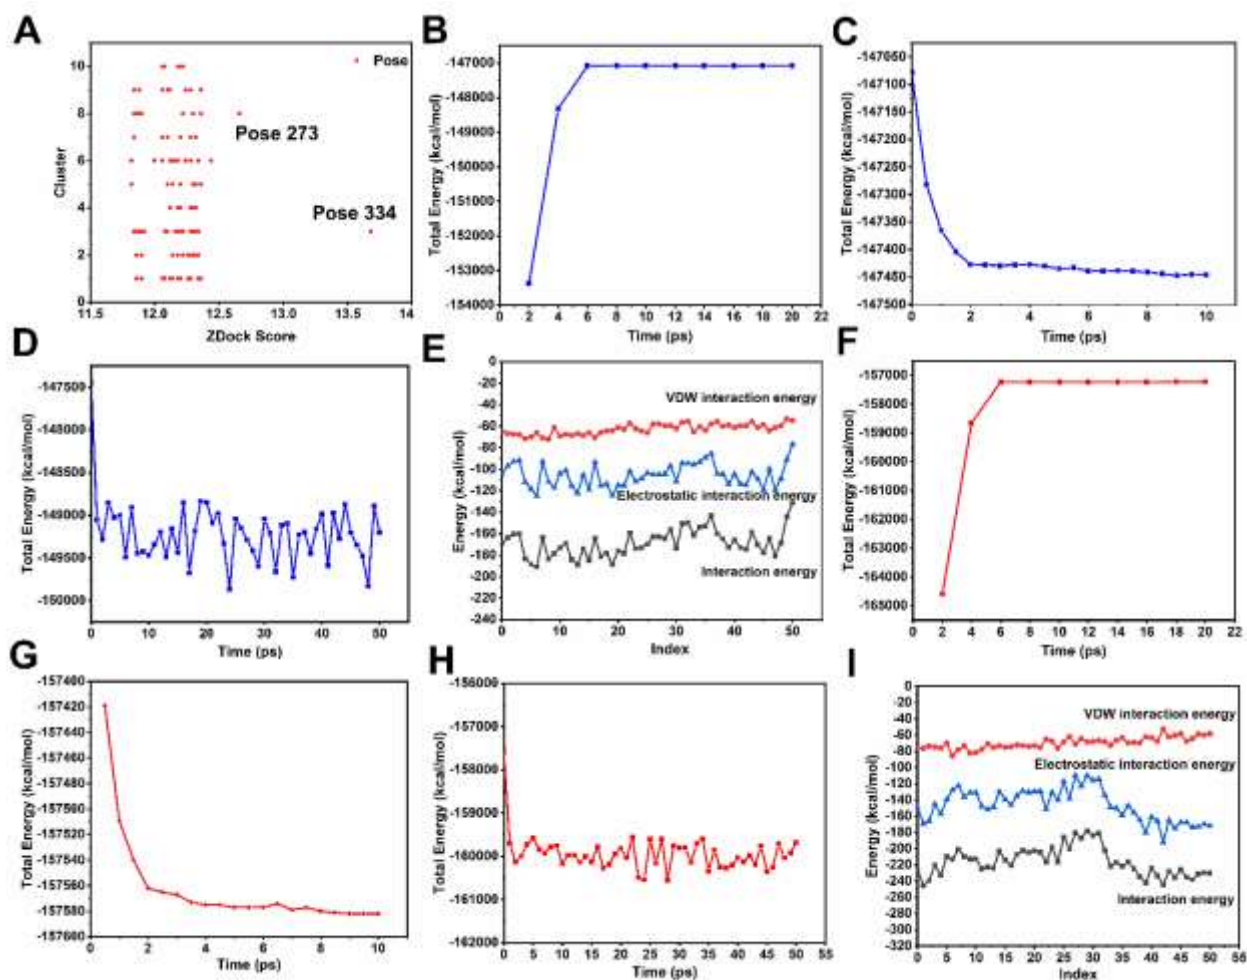

**Fig. S8** (A) ZDock score of the clusters in ZDock simulation. (B-D) Time-total energy curves of the dynamic simulation (B) the healing/cooling simulation, (C) the equilibration simulation and (D) the production simulation). (E) The VDW interaction energy, electrostatic interaction energy and interaction energy curves of the all conformations in the last 50 ps of the production simulation. (F-H) Time-total energy curves of the dynamic simulation (F) the healing/cooling simulation, (G) the equilibration simulation and (H) the production simulation). (I) The VDW interaction energy, electrostatic interaction energy and interaction energy curves of the all conformations in the last 50 ps of the production simulation.

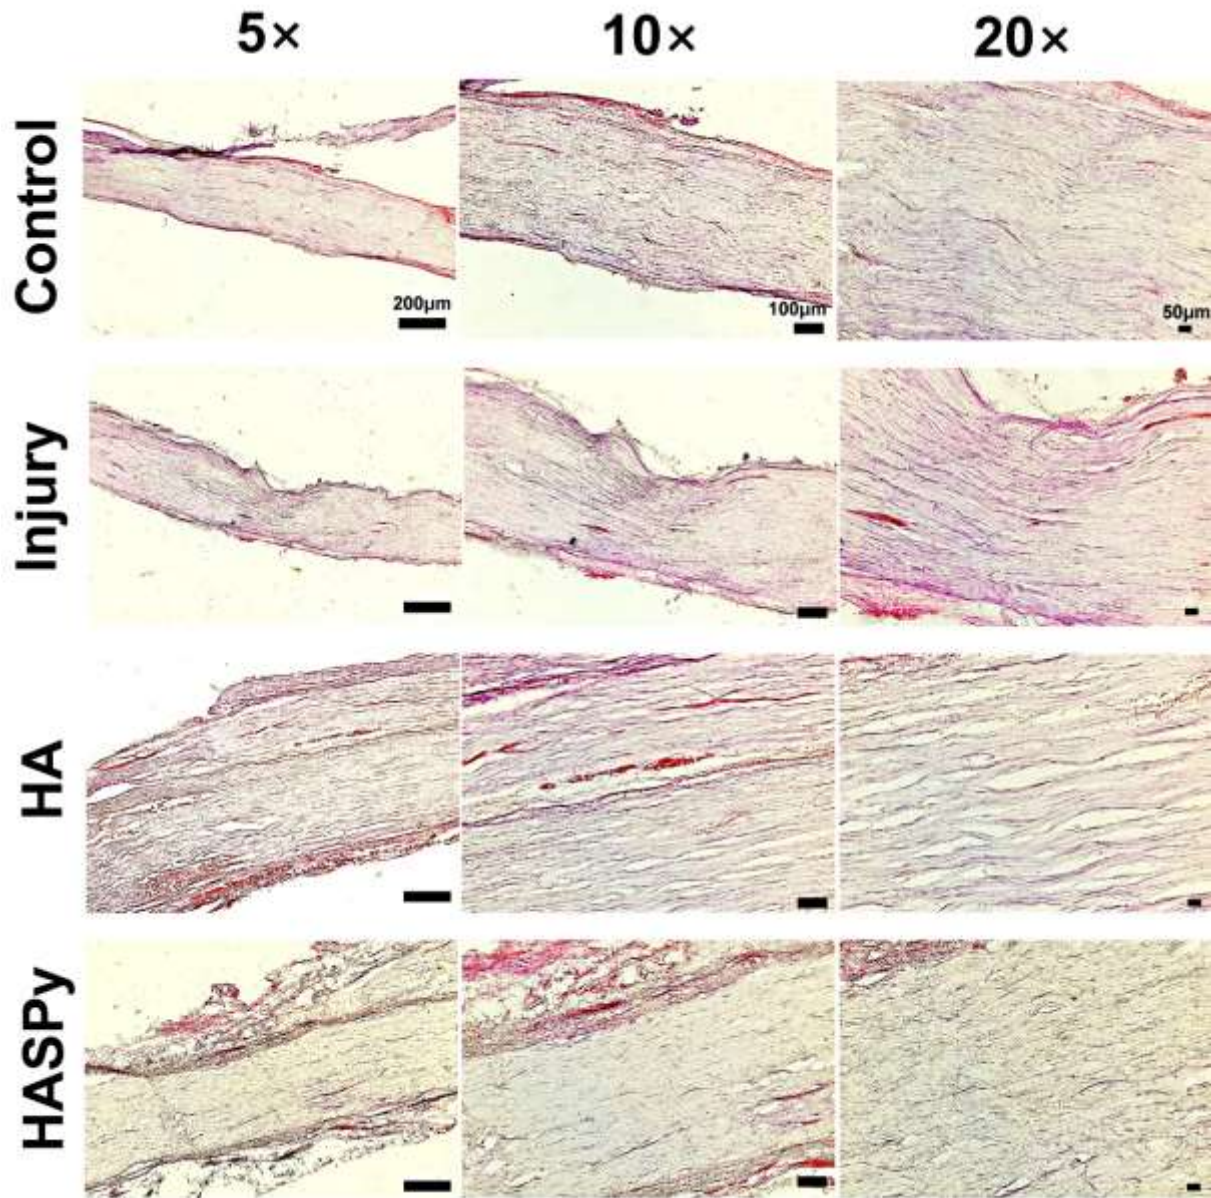

**Fig. S9** Characterization of longitudinal section of sciatic nerve. H&E staining of the longitudinal section of the nerve.

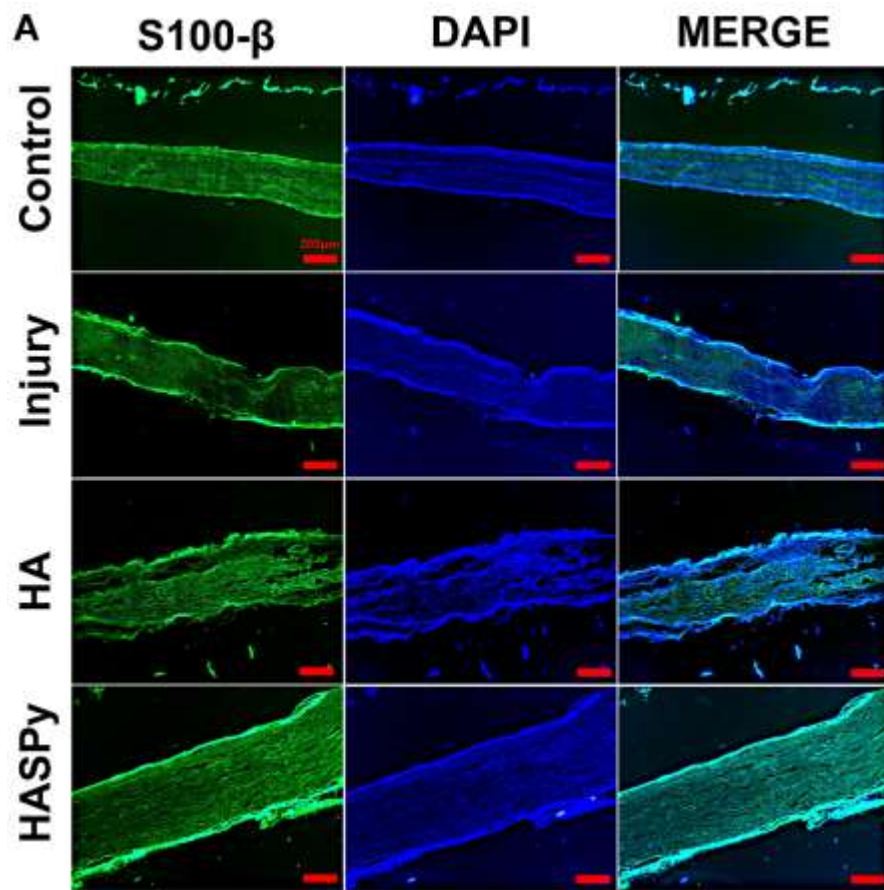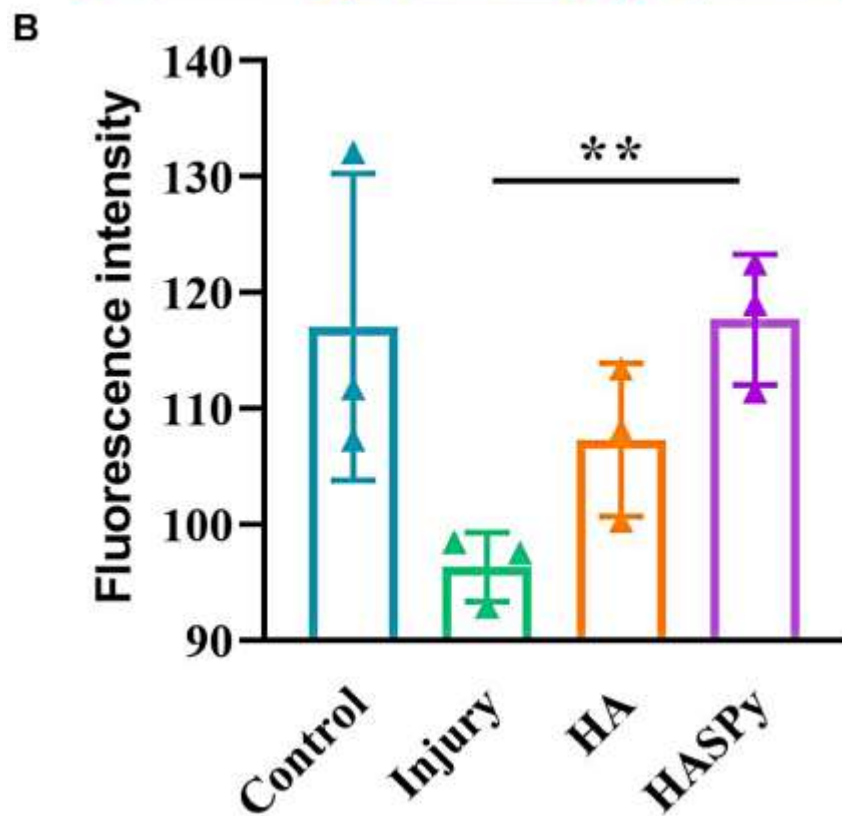

**Fig. S10** (A) Immunofluorescence staining image of the longitudinal section of a nerve (S100- $\beta$ ). (B) Statistics of fluorescence intensity of S100- $\beta$  in control, injury, HA, HASPy. Scale bar: 200  $\mu$ m.

## TABLE

**Table S1.** The interaction energy ( $E_{int}$ ), van der Waals energy ( $E_{vdw}$ ) and electrostatic interaction energy ( $E_{ele}$ ) between HASPy and IL-17A compound protein (IL-17(A, RAH)).

| Conformation        | $E_{int}$ (kcal/mol) | $E_{vdw}$ (kcal/mol) | $E_{ele}$ (kcal/mol) |
|---------------------|----------------------|----------------------|----------------------|
| IL-17(A,RAH) /HASPy | -201.93              | -72.09               | -129.84              |

**Table S2.** The distance and angle DHY of the hydrogen bonds between HASPy and IL-17A compound protein (IL-17(A, RAH)).

| Name                        | Distance | Angle DHY |
|-----------------------------|----------|-----------|
| A:GLN93:HE21 ... O73:HASPy  | 1.8      | 145.1     |
| A:GLN93:HE22 ... O133:HASPy | 2.1      | 161.5     |
| HASPy:H181 ... O:A:PRO91    | 3.0      | 104.4     |
| HASPy:H182 ... O:A:PRO91    | 2.2      | 138.7     |
| H:SER30:HG ... O145:HASPy   | 2.2      | 167.7     |
| HASPy:H244 ... O:H:SER30    | 2.4      | 151.8     |
| HASPy:H178 ... O:H:SER30    | 2.90     | 132.6     |
| HASPy:H179 ... O:H:SER30    | 2.48     | 143.2     |
| HASPy:H245 ... O:H:SER31    | 2.2      | 105.7     |
| HASPy:H246 ... O:H:SER31    | 2.7      | 161.9     |
| H:SER31:HA ... O65:HASPy    | 2.8      | 146.5     |
| H:SER53:HG ... O73:HASPy    | 2.0      | 134.7     |
| H:SER53:HG ... O81:HASPy    | 1.8      | 124.9     |
| H:SER53:HB2 ... O73:HASPy   | 2.5      | 100.5     |
| H:SER53:HB2 ... O146:HASPy  | 2.8      | 105.3     |
| H:GLY55:HN ... O146:HASPy   | 2.1      | 132.9     |
| H:SER74:HN ... O35:HASPy    | 2.0      | 157.0     |
| H:SER74:HG ... O35:HASPy    | 1.8      | 152.2     |
| H:SER74:HB1 ... O35:HASPy   | 3.0      | 90.6      |
| H:LYS75:HE2 ... O48:HASPy   | 2.7      | 109.5     |
| HASPy:H164 ... O:H:ARG71    | 2.7      | 137.6     |
| HASPy:H225 ... O:H:SER53    | 2.6      | 132.6     |

**Table S3.** The interaction energy ( $E_{int}$ ), van der Waals energy ( $E_{vdw}$ ), electrostatic interaction energy ( $E_{ele}$ ) and total hydrophobic interaction energy ( $E_{total}$ ) between HASPy and individual residues in IL-17(A, RAH).

| Hydrophobic residue    | $E_{int}$ (kcal/mol) | $E_{vdw}$ (kcal/mol) | $E_{ele}$ (kcal/mol) |
|------------------------|----------------------|----------------------|----------------------|
| ILE66                  | -0.086995            | -0.002611            | -0.084384            |
| ALA69                  | 0.386252             | -0.019751            | 0.406002             |
| CYS71                  | 0.98818              | -0.030421            | 1.0186               |
| LEU74                  | 0.086842             | -0.00506             | 0.091903             |
| CYS76                  | -0.00105             | -0.000706            | -0.000344            |
| MET87                  | -0.189936            | -0.003526            | -0.18641             |
| VAL90                  | -2.194629            | -1.748269            | -0.44636             |
| ILE92                  | -2.749146            | -2.268302            | -0.480844            |
| ILE96                  | 0.17449              | -0.015125            | 0.189616             |
| LEU97                  | -0.000387            | -0.000049            | -0.000339            |
| VAL98                  | 0.005142             | -0.001682            | 0.006824             |
| ILE115                 | -0.804715            | -0.19755             | -0.607165            |
| LEU116                 | -5.910539            | -3.640874            | -2.269664            |
| VAL117                 | 0.997034             | -0.197711            | 1.194745             |
| VAL119                 | -1.04904             | -0.062044            | -0.986996            |
| CYS121                 | -0.023291            | -0.070416            | 0.047124             |
| CYS123                 | -0.037994            | -0.049974            | 0.01198              |
| VAL124                 | -1.182498            | -1.209063            | 0.026565             |
| ILE127                 | -0.143883            | -0.00485             | -0.139033            |
| VAL128                 | 0.062285             | -0.011031            | 0.073315             |
| H_LEU-4                | -0.02214             | -0.000395            | -0.021745            |
| H_VAL2                 | -0.00567             | -0.000003            | -0.005667            |
| H_LEU18                | -0.000378            | 0                    | -0.000378            |
| H_LEU20                | 0.105571             | -0.00426             | 0.10983              |
| H_CYS22                | 0.400647             | -0.00374             | 0.404386             |
| H_ALA23                | 0.054724             | -0.006969            | 0.061692             |
| H_ALA24                | -0.18099             | -0.003039            | -0.177951            |
| H_PHE27                | -0.156423            | -0.022285            | -0.134138            |
| H_PHE29                | -0.483258            | -0.507838            | 0.02458              |
| H_ALA33                | 0.01608              | -0.12316             | 0.13924              |
| H_MET34                | -0.158175            | -0.016188            | -0.141986            |
| H_ALA50                | 0.10395              | -0.000653            | 0.104603             |
| H_ILE51                | -1.27955             | -0.272918            | -1.006632            |
| H_ILE69                | 0.055276             | -0.029606            | 0.084882             |
| H_LEU78                | 0.255156             | -0.035527            | 0.290682             |
| H_LEU80                | -0.090309            | -0.000958            | -0.089351            |
| H_LEU96                | -0.078098            | -0.070991            | -0.007106            |
| H_ILE97                | -0.291816            | -0.077977            | -0.213839            |
| H_VAL100               | 0.072341             | -0.000258            | 0.072599             |
| $E_{total}$ (kcal/mol) | -13.35694            |                      |                      |

**Table S4.** The interaction energy ( $E_{\text{int}}$ ), van der Waals energy ( $E_{\text{vdw}}$ ) and electrostatic interaction energy ( $E_{\text{ele}}$ ) between HASPy and IL-17A compound protein (IL-17RA (H, L)).

| Conformation       | $E_{\text{int}}$ (kcal/mol) | $E_{\text{vdw}}$ (kcal/mol) | $E_{\text{ele}}$ (kcal/mol) |
|--------------------|-----------------------------|-----------------------------|-----------------------------|
| IL-17RA(H,L)/HASPy | -245.69                     | -76.70                      | -168.99                     |

**Table S5.** The distance and angle DHY of the hydrogen bonds between HASPy and IL-17A compound protein (IL-17RA (H, L)).

| Name                                                   | Distance | Angle DHY |
|--------------------------------------------------------|----------|-----------|
| H:LYS43:H <sub>Z1</sub> ... O <sub>45</sub> :HASPy     | 1.8      | 132.9     |
| H:LYS43:H <sub>Z3</sub> ... O <sub>48</sub> :HASPy     | 1.7      | 141.7     |
| H:GLN1438:HE <sub>21</sub> ... O <sub>146</sub> :HASPy | 2.1      | 126.1     |
| H:ALA168:H <sub>N</sub> ... O <sub>133</sub> :HASPy    | 2.0      | 172.5     |
| H:TYR176:H <sub>11</sub> ... O <sub>132</sub> :HASPy   | 2.0      | 164.5     |
| L:GLY41:H <sub>N</sub> ... O <sub>145</sub> :HASPy     | 2.8      | 96.4      |
| L:LYS103:H <sub>Z2</sub> ... O <sub>26</sub> :HASPy    | 1.8      | 129.1     |
| L:THR164:H <sub>G1</sub> ... O <sub>36</sub> :HASPy    | 1.9      | 155.2     |
| L:LYS167:H <sub>N</sub> ... O <sub>142</sub> :HASPy    | 2.4      | 143.4     |
| L:SER169:H <sub>G</sub> ... O <sub>57</sub> :HASPy     | 2.4      | 118.6     |
| HASPy:H <sub>236</sub> ... OD <sub>2</sub> :L:ASP85    | 2.4      | 158.9     |
| H:PRO167:H <sub>A</sub> ... O <sub>133</sub> :HASPy    | 2.4      | 150.4     |
| H:SER172:H <sub>B2</sub> ... O <sub>110</sub> :HASPy   | 2.6      | 156.7     |
| L:PRO40:H <sub>A</sub> ... O <sub>145</sub> :HASPy     | 2.8      | 99.7      |
| L:GLY101:H <sub>A2</sub> ... O <sub>22</sub> :HASPy    | 2.3      | 128.8     |
| L:TAR164:H <sub>B</sub> ... O <sub>49</sub> :HASPy     | 2.6      | 116.9     |
| HASPy:H <sub>156</sub> ... O:L:H1S8                    | 2.5      | 160.7     |
| HASPy:H <sub>157</sub> ... O:L:GLY100                  | 2.6      | 118.0     |
| HASPy:H <sub>178</sub> ... O:L:GLY41                   | 2.6      | 132.78    |
| HASPy:H <sub>179</sub> ... O:L:PRO40                   | 2.5      | 145.4     |
| HASPy:H <sub>180</sub> ... O:L:GLY41                   | 2.4      | 149.0     |
| HASPy:H <sub>214</sub> ... O:H:LEU170                  | 3.0      | 110.0     |
| HASPy:H <sub>230</sub> ... O:L:LYS167                  | 2.6      | 171.1     |



**Table S6.** The interaction energy ( $E_{int}$ ), van der Waals energy ( $E_{vdw}$ ), electrostatic interaction energy ( $E_{ele}$ ) and total hydrophobic interaction energy ( $E_{total}$ ) between HASPy and individual residues in IL-17RA (H, L).

| Hydrophobic residue    | $E_{int}$ (kcal/mol) | $E_{vdw}$ (kcal/mol) | $E_{ele}$ (kcal/mol) |
|------------------------|----------------------|----------------------|----------------------|
| H_LEU4                 | 0.322279             | -0.000150            | 0.322429             |
| H_LEU5                 | -0.089535            | -0.000865            | -0.088670            |
| H_LEU11                | 0.005733             | -0.000043            | 0.005776             |
| H_VAL12                | 0.105233             | -0.000034            | 0.105267             |
| H_VAL37                | 0.000036             | -0.000000            | 0.000037             |
| H_ALA40                | -0.618720            | -0.445730            | -0.172990            |
| H_LEU45                | 0.084089             | -0.043171            | 0.127260             |
| H_LEU82                | 0.012339             | -0.000001            | 0.012341             |
| H_ALA84                | -0.392329            | -0.093272            | -0.299057            |
| H_ALA88                | -0.142763            | -0.076873            | -0.065890            |
| H_VAL89                | -0.248065            | -0.543941            | 0.295875             |
| H_CYS92                | -0.094211            | -0.000067            | -0.094144            |
| H_LEU108               | -1.464209            | -0.464993            | -0.999216            |
| H_VAL109               | 0.522229             | -0.018030            | 0.540259             |
| H_VAL111               | 0.021125             | -0.010758            | 0.031883             |
| H_ALA114               | -0.381407            | -0.024865            | -0.356542            |
| H_LEU141               | -0.014229            | -0.000026            | -0.014202            |
| H_VAL142               | 0.861419             | -0.002829            | 0.864248             |
| H_PHE146               | -0.933635            | -0.071143            | -0.862492            |
| H_VAL150               | 0.899929             | -0.046612            | 0.946541             |
| H_VAL152               | -0.360785            | -0.001487            | -0.359298            |
| H_VAL163               | 0.189283             | -0.021605            | 0.210889             |
| H_PHE166               | 0.204845             | -0.379100            | 0.583945             |
| H_ALA168               | -9.149320            | -2.883360            | -6.265960            |
| H_VAL169               | -2.983793            | -2.191046            | -0.792747            |
| H_LEU170               | -7.268606            | -6.349358            | -0.919248            |
| H_LEU175               | 0.423986             | -0.122182            | 0.546169             |
| H_LEU178               | -0.665667            | -0.238022            | -0.427645            |
| H_VAL181               | -0.236897            | -0.000297            | -0.236600            |
| H_VAL198               | -0.003046            | -0.000002            | -0.003044            |
| L_MET3                 | -0.035902            | -0.000871            | -0.035031            |
| L_LEU4                 | -0.120553            | -0.004687            | -0.115866            |
| L_VAL11                | -0.284520            | -0.038315            | -0.246205            |
| L_ILE21                | 0.078218             | -0.003817            | 0.082034             |
| L_CYS23                | -0.014124            | -0.001470            | -0.012653            |
| L_VAL47                | 0.001559             | -0.000001            | 0.001560             |
| L_LEU73                | -0.016360            | -0.000031            | -0.016329            |
| L_ALA84                | -0.186072            | -0.097178            | -0.088894            |
| L_CYS88                | -0.127517            | -0.008006            | -0.119511            |
| L_PHE98                | -0.007377            | -0.004495            | -0.002882            |
| L_ILE104               | 0.484668             | -0.081648            | 0.566316             |
| L_VAL106               | -0.264268            | -0.000642            | -0.263626            |
| L_LEU107               | 0.002505             | -0.000005            | 0.002510             |
| L_CYS135               | -0.093589            | -0.000034            | -0.093555            |
| L_LEU136               | -0.045637            | -0.000086            | -0.045550            |
| L_ILE137               | 0.065840             | -0.000252            | 0.066092             |
| L_PHE140               | -0.083053            | -0.001771            | -0.081282            |
| L_ALA144               | 0.005539             | -0.000484            | 0.006024             |
| L_VAL145               | 0.457846             | 0.002764             | 0.460610             |
| L_VAL147               | 0.006970             | -0.000172            | 0.007142             |
| L_ALA158               | -0.758227            | -0.001765            | -0.756462            |
| L_VAL160               | -0.112710            | -0.022644            | -0.090067            |
| L_ALA174               | 0.400048             | -0.088890            | 0.488939             |
| L_ALA175               | -0.535874            | -0.043566            | -0.492308            |
| L_LEU179               | -0.000724            | -0.000000            | -0.000724            |
| $E_{total}$ (kcal/mol) |                      |                      | -22.577685           |
